# A Pair Formation Model with Recovery: Application to Monkeypox

Matthew I Betti<sup>a,c,\*</sup>, Lauren Farrell<sup>a</sup>, and Jane Heffernan<sup>b,c</sup>

<sup>a</sup>Mount Allison University, Sackville, Canada; <sup>b</sup>York University, Toronto, Canada; <sup>c</sup>Centre for Disease Modeling, Toronto, Canada; \* corresponding author

This manuscript was compiled on August 17, 2022

1 **The current global outbreaks of Monkeypox is a unique infectious disease in the way it seems to be transmitting: it has been observed to be**  
2 **highly concentrated in communities of men who have sex with men (MSM) through pair formation, and also provides immunity. This framework**  
3 **of mostly close, prolonged contact spreading a disease that admits immunity after infection is unlike similar infections which either offer little**  
4 **to no immunity post-infection or are lifelong infections. This creates the need for a new model framework that incorporates pair formation**  
5 **structure with recovery. While seemingly a straight forward model, we show how new dynamics arise from the combination of pair formation**  
6 **and recovery that are not present in a standard model with recovery and also not present in a pair formation model without recovery. We see**  
7 **that the combination of these two properties allows for waves of infection that are not seen in a standard SIR model. These dynamics suggest**  
8 **that outbreaks of monkeypox around the world may require special attention from public health. We also derive a reproduction number for this**  
9 **model and estimate the reproduction number of human monkeypox to be  $\approx 2.3$  using global and Canadian data. The expression derived for  $R_0$**   
10 **can help estimate key parameters for diseases transmission and public health interventions and compare to equivalent models without pair**  
11 **formation.**

Pair Formation | Mathematical Model | Monkeypox |

## 1. Introduction

2 Infections that require close, prolonged contact are more realistically modeled by pair formation models (1). Sexually transmitted  
3 diseases fall within this scope. Many sexually transmitted infections are either treatable, with potential for reinfection (e.g.  
4 chlamydia (2, 3), gonorrhea(4, 5)) or are chronic as in the case of HIV (6) and HSV (7). As such, pair formation models have  
5 been limited to tracking susceptible-infected or susceptible-infected-susceptible structures.

6 A seminal model on pair formation was developed in (8). In this study, Kretzschmar *et al.* develop a model for the spread  
7 of infection through pair formation for a chronic disease. The model is extended to include two infectious classes as well. Deep  
8 insights into the behaviour of the model and its epidemiological interpretations are present in the paper; the basic reproduction  
9 number is computed, and it is shown that a model without pair formation can underestimate the overall prevalence of disease  
10 in a population (8). The Kretzschmar *et al.* model has also been extended to include long-term and casual partnerships  
11 (9, 10). In this model, individuals are allowed to become susceptible again after infection. In this study it is shown that the  
12 importance of casual partnerships in spreading infection is dependent on the duration of infection; in short-lived infections,  
13 casual partnerships are crucial to spreading infection (9).

14 In recent times, monkeypox has begun to spread in many global regions (11). Monkeypox, a disease caused by the monkeypox  
15 virus, is a relative of the smallpox and the cowpox viruses. The endemic region for monkeypox is historically Central and West  
16 Africa (12), first being observed in 1970 (13). The vast majority of monkeypox infections will recover and it is theorized that  
17 these individuals gain long-term immunity (14–16). The case fatality ratio of monkeypox is strain dependent with case fatality  
18 ratios ranging from 1% to 11% (17) and the more fatal strains having been observed to have human-to-human transmission  
19 (17).

20 Monkeypox transmission requires close, prolonged contact with an infected individual (11). While not directly sexually  
21 transmitted, this close, prolonged contact is best modeled by pair formation. Moreover, in the recent international outbreak of

### Significance Statement

With outbreaks of Monkeypox being observed around the world, a modeling framework which takes into account the unique properties of this emerging disease is necessary for understanding the disease and public health mitigation. Monkeypox seems to be unique in that it requires close, prolonged contact with an infected individual in order to spread, but also provides immunity after infection. We develop a model for this situation and show how this differs from simpler models which are currently being used for disease dynamics.

MB developed and analyzed the model; LF refined the model; JH analyzed the model and contributed to the writing of the manuscript.

The authors have no competing interests.

<sup>2</sup>To whom correspondence should be addressed. E-mail: mbetti@mta.ca

22 monkeypox, observed cases seem to be concentrated in the community of men who have sex with men (18). Cases have have  
 23 also been tied to international travel (18). As case counts rise above stochastic effects and cases are found outside of sexual  
 24 encounters(19), the need for a mechanistic model that can capture the routes of transmission and analyze scenarios for disease  
 25 outcomes is requires.

26 This creates a unique situation where a disease can be modeled by a pair formation model, but individuals can recover with  
 27 immunity (20). Moreover, vaccination is possible as it has been observed that inoculation with a smallpox vaccine provides  
 28 sufficient immunity against monkeypox (21).

29 In the current study, we develop a framework for a model of pair formation with recovery by extending the model developed  
 30 in (8). We show how the dynamics of this model differ from a standard *SIR* model, and can lead to multiple waves of infection.  
 31 We formulate the basic reproduction number for this model that can be used as more information becomes available to better  
 32 estimate the reproduction of monkeypox within a population; as a need for such an expression has been stated in the literature  
 33 (22). Lastly, we validate this model versus a standard *SIR* model by parameterizing both the pair-formation model and a  
 34 standard *SIR* model and show that model selection metrics favour the pair-formation model.

35 We discuss extensions to the model that may prove useful for long-term forecasting of outbreaks, the creation of animal  
 36 reservoirs, and effective vaccination strategies against further monkeypox outbreaks.

## 37 2. The Model

38 **A. Infection through Pair Formation.** Current evidence points to Monkeypox being transmitted via prolonged, close contact  
 39 between individuals; particularly those in the men who have sex with men (MSM) community. Thus, the standard *SIR* model  
 40 that assumes instantaneous contacts and a well-mixed population will not suffice here.

A pair formation model structure(8) will form the basis for a model of monkeypox. The model in (8) is insufficient as  
 it assumes lifelong infectivity, therefore we need to add a compartment *R*. The standard model of pair formation, with a  
 susceptible class, *S*, and infectious class *I*, and a recovered class *R*, can be written as

$$\frac{dS}{dt} = B - (\mu + \rho)S + (\sigma + \mu)(2P_{SS} + P_{SI} + P_{SR}) \quad [1]$$

$$\frac{dI}{dt} = -(\mu + \rho + \delta)I + (\sigma + \mu)(2P_{II} + P_{SI} + P_{IR}) \quad [2]$$

$$\frac{dR}{dt} = -(\mu + \rho)R + \delta I + (\sigma + \mu)(2P_{RR} + P_{SR} + P_{IR}) \quad [3]$$

$$\frac{dP_{SS}}{dt} = \frac{1}{2}\rho\frac{S^2}{N} - (\sigma + 2\mu)P_{SS} \quad [4]$$

$$\frac{dP_{SI}}{dt} = \rho(1-h)\frac{SI}{N} - (\sigma + \phi h + 2\mu + \delta)P_{SI} \quad [5]$$

$$\frac{dP_{II}}{dt} = \frac{1}{2}\rho\frac{I^2}{N} + \rho h\frac{SI}{N} + \phi h P_{SI} - (\sigma + 2\mu + 2\delta)P_{II} \quad [6]$$

$$\frac{dP_{SR}}{dt} = \delta P_{SI} + \rho\frac{SR}{N} - (\sigma + 2\mu)P_{SR} \quad [7]$$

$$\frac{dP_{IR}}{dt} = \rho\frac{IR}{N} + \delta P_{II} - (\sigma + 2\mu + \delta)P_{IR} \quad [8]$$

$$\frac{dP_{RR}}{dt} = \delta P_{IR} + \frac{1}{2}\rho\frac{R^2}{N} - (\sigma + 2\mu)P_{RR} \quad [9]$$

41 The parameters interpretations are given in Table 1.

| Parameter | Description                     | Value                       | Reference |
|-----------|---------------------------------|-----------------------------|-----------|
| $B$       | Recruitment into population     | $\mu$                       |           |
| $\mu$     | Removal from population         | $(18250 \text{ days})^{-1}$ | (23)      |
| $\rho$    | pair formation rate             | $(15 \text{ days})^{-1}$    |           |
| $\sigma$  | pair dissolution rate           | $(1 \text{ day})^{-1}$      |           |
| $\delta$  | infection recovery rate         | $(30 \text{ days})^{-1}$    | (24)      |
| $h$       | probability of transmission     | 0.9                         |           |
| $\phi$    | Contact rate within partnership | 1                           |           |

**Table 1. Table of parameters use to explore the model's qualitative and quantitative features. In Section 5, we estimate model parameters for global and Canadian monkeypox case counts.**

The total number of active infections is given by

$$T_I(t) = I(t) + P_{SI}(t) + P_{RI}(t) + 2P_{II}(t) \quad [10]$$

42 There are some assumptions built-in to this model for the sake of simplicity. The assumptions are

- 43 • Pairs are monogamous for the duration of their pairing.

- 44 • Groups of three or more cannot be formed.
- 45 • If one individual of a pair is removed from the population, the other individual is returned to the single compartment
- 46 and can form a new pair.
- 47 • There is no public health intervention.

**B. SIR with standard incidence.** A more common method for modelling close, prolonged contact is through an *SIR* model with standard incidence. The model equations are given by

$$\frac{dS}{dt} = B - \mu S - \beta \frac{SI}{S + I + R} \quad [11]$$

$$\frac{dI}{dt} = \beta \frac{SI}{S + I + R} - (\delta + \mu)I \quad [12]$$

$$\frac{dR}{dt} = \delta I - \mu R \quad [13]$$

48 In this model, individuals enter the population through parameter  $B$ , leave the population through parameter  $\mu$  and recover  
49 from infection with immunity at rate  $\delta$ . Infection is passed from an infected individual to a susceptible individual at rate  $\beta$ .

The basic reproduction number for this model is simply given by

$$r_0 = \frac{\beta}{\delta + \mu} \quad [14]$$

50 In the following analysis,  $\beta$  will be chosen so that  $R_0 = r_0$ ; while  $\delta$  and  $\mu$  - parameters that are far easier to measure - will be  
51 set equal.

### 52 3. Alternative formulation

Due to the inclusion of recovery, particularly the term  $\delta P_{II}$  in equation Eq. (8), the model cannot be fully reformulated to remove  $P_{II}$  as in (8). We can however augment the model with the total number of infections

$$\frac{dT_I}{dt} = \rho h \frac{SI}{N} + \phi h P_{SI} - (\mu + \delta)T_I - \delta P_{II} \quad [15]$$

53 where  $T_I = I + P_{SI} + 2P_{II} + P_{IR}$ .

### 54 4. Results

55 **A. The Basic Reproduction Number.** The basic SIR pair formation model given by equations Eq. (1) through Eq. (9) is large,  
56 but simple in its treatment of disease. Since new infections can only enter the system through the  $P_{II}$  class, the Next Generation  
57 Matrix (NGM) approach (25) reduces the system to a matrix system of rank 1, from which we can compute the reproduction  
58 number.

We first linearize the system around the disease-free equilibrium given by

$$I = P_{SI} = P_{II} = P_{SR} = P_{SI} = P_{RI} = P_{RR} = 0 \quad [16]$$

We refactor the linearized system into the standard  $F$  and  $V$  matrices, where  $F$  is the terms related to new infections, and  $V$  consists of all flux terms between classes and the system has the form

$$\frac{dX}{dt} = F - V. \quad [17]$$

In the case of pair formation, all classes except  $P_{RR}$  participate in the formation of new infections. This leads to an  $8 \times 8$  matrix. The only terms involved in the creation of new infections are

$$T_1 = \rho h \frac{SI}{N}$$

$$T_2 = \phi h P_{SI}$$

Since both terms appear in class  $P_{II}$ ,  $F$  is a sparse matrix of rank 1 and can be written as

$$F = \begin{bmatrix} 0 & 0 & 0 & 0 & 0 & 0 & 0 & 0 & 0 \\ 0 & 0 & 0 & 0 & 0 & 0 & 0 & 0 & 0 \\ 0 & 0 & 0 & 0 & 0 & 0 & 0 & 0 & 0 \\ 0 & 0 & 0 & 0 & 0 & 0 & 0 & 0 & 0 \\ 0 & 0 & 0 & 0 & 0 & 0 & 0 & 0 & 0 \\ 0 & \rho h & 0 & 0 & \phi h & 0 & 0 & 0 & 0 \\ 0 & 0 & 0 & 0 & 0 & 0 & 0 & 0 & 0 \\ 0 & 0 & 0 & 0 & 0 & 0 & 0 & 0 & 0 \end{bmatrix} \quad [18]$$

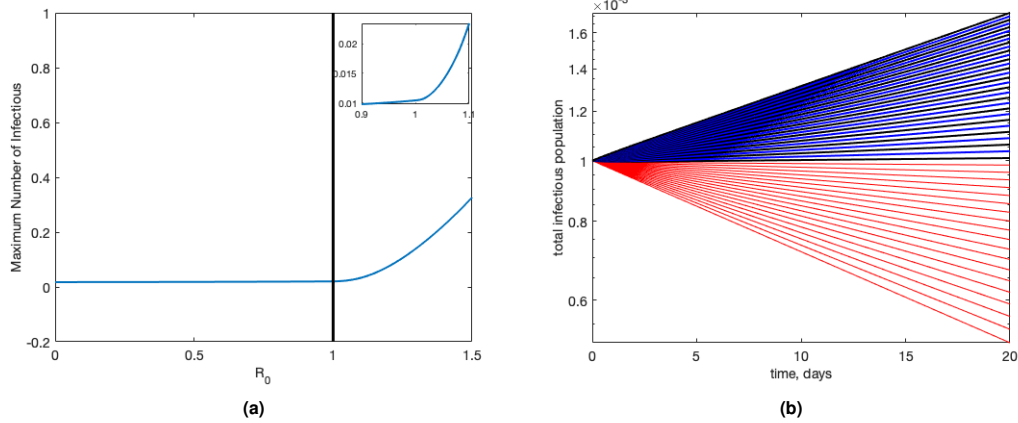

**Fig. 1.** Numerical confirmation of  $R_0$  (equation Eq. (20)), visualized in two ways. We start all simulations with  $I(0) = 1 \times 10^{-3}$ . Panel (a): The maximum number of infections for the model given by equations Eq. (1) through Eq. (9) as a function of  $R_0$ . We see that the expression for  $R_0$  provided by equation Eq. (20) is verified numerically. Panel (b): Infection curves for different values of  $R_0$ . Red curves represent where  $R_0 < 1$  and black/blue curves are scenarios where  $R_0 > 1$ . Colours alternate between black and blue for clarity.

All other terms are relegated to the matrix  $V$ .

$$V = \begin{bmatrix} \mu + \rho & 0 & 0 & -2(\sigma + \mu) & -(\sigma + \mu) & 0 & -(\sigma + \mu) & 0 & 0 \\ 0 & \mu + \rho + \delta & 0 & 0 & -(\sigma + \mu) & -2(\sigma + \mu) & 0 & -(\sigma + \mu) & 0 \\ 0 & -\delta & \mu + \rho & 0 & 0 & 0 & -(\sigma + \mu) & -(\sigma + \mu) & -2(\sigma + \mu) \\ -\rho/2 & 0 & 0 & \sigma + 2\mu & 0 & 0 & 0 & 0 & 0 \\ 0 & -\rho(1-h) & 0 & 0 & \sigma + 2\mu + \delta + \phi h & 0 & 0 & 0 & 0 \\ 0 & 0 & 0 & 0 & 0 & \sigma + 2\mu + 2\delta & 0 & 0 & 0 \\ 0 & 0 & -\rho & 0 & -\delta & 0 & \sigma + 2\mu & 0 & 0 \\ 0 & 0 & 0 & 0 & 0 & -\delta & 0 & \sigma + 2\mu + \delta & 0 \\ 0 & 0 & 0 & 0 & 0 & 0 & 0 & -\delta & \sigma + 2\mu \end{bmatrix} \quad [19]$$

The next generation matrix is then given by

$$FV^{-1} = \begin{bmatrix} 0 & 0 & 0 & 0 & 0 & 0 & 0 & 0 & 0 \\ 0 & 0 & 0 & 0 & 0 & 0 & 0 & 0 & 0 \\ 0 & 0 & 0 & 0 & 0 & 0 & 0 & 0 & 0 \\ 0 & 0 & 0 & 0 & 0 & 0 & 0 & 0 & 0 \\ 0 & 0 & 0 & 0 & 0 & 0 & 0 & 0 & 0 \\ 0 & \frac{\rho h(\delta + 2\mu + \phi + \sigma)}{K} & 0 & 0 & \frac{h((\mu + \phi + \sigma)\rho + \phi(\mu + \delta))}{M} & \frac{\rho h(\sigma + \mu)(2\sigma + 4\mu + 3\delta)(\delta + 2\mu + \phi + \sigma)}{K(\sigma + 2\mu + \delta)^2} & 0 & \frac{\rho h(\sigma + \mu)(\delta + 2\mu + \phi + \sigma)}{K(\sigma + 2\mu + \delta)} & 0 \\ 0 & 0 & 0 & 0 & 0 & 0 & 0 & 0 & 0 \\ 0 & 0 & 0 & 0 & 0 & 0 & 0 & 0 & 0 \\ 0 & 0 & 0 & 0 & 0 & 0 & 0 & 0 & 0 \end{bmatrix}$$

where

$$K = 2\mu^2 + (3\delta + \sigma + (h+1)\rho + \phi h)\mu + \delta^2 + (\phi h + \rho + \sigma)\delta + \rho h(\phi + \sigma)$$

$$M = ((h+1)\mu + \phi h + h\sigma + \delta)\rho + (\mu + \delta)(\phi h + \delta + 2\mu + \sigma)$$

Since  $F$  is rank 1, the product  $FV^{-1}$  is also rank 1. This leave a unique, non-zero eigenvalue for the next generation matrix. By definition, this eigenvalue can be interpreted as  $R_0$ . It is given by

$$R_0 = \rho h \frac{(\sigma + \mu)(2\sigma + 4\mu + 3\delta)(2\mu + \phi + \delta + \sigma)}{(2\mu + \delta + \sigma)(2\mu + 2\delta + \sigma)(2\mu^2 + (3\delta + \sigma + (1+h)\rho + \phi h)\mu + \delta^2 + (\phi h + \rho + \sigma)\delta + \rho h(\phi + \sigma))} \quad [20]$$

59 This equation is numerically validated in Figure 1. While the expression is closed and can be used for monitoring, forecasting  
60 and policy purposes, the nature of the NGM approach leaves this particular expression difficult to interpret.

**B. Alternative Reproduction Number.** Recreating the next generation matrix with all new infections entering the system through equation Eq. (15), and infectious individuals transitioning through the classes  $I$ ,  $P_{SI}$ ,  $P_{II}$ , and  $P_{IR}$  allows an alternative formulation of the basic reproduction number that is more readily comparable to (8). This is given by

$$\mathcal{R}_0 = \frac{\rho h(\sigma + \mu)(\sigma + 2\mu + 2\delta)(\delta + 2\mu + \phi + \sigma)}{(2\mu + \delta + \sigma)(2\delta^3 + a_2\delta^2 + a_1\delta + a_0)} \quad [21]$$

where

$$a_0 = (2\mu + \rho + \sigma)(\phi h + 2\mu + \sigma)\mu \quad [22]$$

$$a_1 = 10\mu^2 + (7\sigma + (h + 4)\rho + 4\phi h)\mu + \sigma^2 + ((h + 1)\rho + \phi h)\sigma + 2h\phi\rho \quad [23]$$

$$a_2 = 2\phi h + 8\mu + 2\rho + 3\sigma \quad [24]$$

$$[25]$$

61 When  $\delta = 0$ , this formulation agrees exactly with the basic reproduction number given in (8). Unlike the reproduction number  
62 for the model without recovery(8), the denominator here cannot be nicely factored.

63 We note here that  $R_0$  and  $\mathcal{R}_0$  have the same threshold value, as expected.

**C. Average Number of Partners during Infection.** Using the ansatz that

$$\mathcal{R}_0 = n_{\mathcal{R}_0} h_p \quad [26]$$

64 in other words, the basic reproduction number is the product of the number of partnerships formed in one infectious lifetime,  
65  $n$ , and the probability of infection per partnership,  $h_p$ , we can use either of our formulations to estimate the average number of  
66 partnerships of one infected individual in a completely susceptible population.

At the beginning of an outbreak, we may assume that the entire population is susceptible and divided between classes  $S$   
and  $P_{SS}$ . Importantly,  $P_{SI} = P_{II} = P_{IR} = R = 0$ . This means that the only partnerships that can form at the beginning of an  
outbreak which involve a susceptible individual are  $P_{SI}$ . In this case, setting  $h = 1$  would imply  $h_p = 1$ . Thus,  $\mathcal{R}_0 \Big|_{h=1}$ , or

$R_0 \Big|_{h=1}$ , gives the number of partnerships during one infectious lifetime. Mathematically we see this realized as

$$n_{\mathcal{R}_0} = 1/4 \frac{(\sigma + 2\mu + 2\delta)(\sigma + \mu)\rho}{(\mu + \delta/2 + \sigma/2)(\mu^2 + (\rho/2 + 2\delta + \sigma/2)\mu + \delta(\rho + \delta + \sigma/2))} \quad [27]$$

$$n_{R_0} = \frac{(2\sigma + 4\mu + 3\delta)(\sigma + \mu)\rho}{(\delta + \mu + \rho)(\sigma + 2\mu + 2\delta)(\sigma + 2\mu + \delta)} \quad [28]$$

67 Again, when  $\delta = 0$ , equation Eq. (27) corresponds exactly to  $n$  as presented in (8).

**D. The limit  $\sigma \rightarrow \infty$ .** The limit as  $\sigma$  approaches infinity corresponds to the case when pairings become transient contacts. In  
this case the model, as well as  $\mathcal{R}_0$  given in equation Eq. (21), reduce to a simple SIR model with the basic reproduction number  
being given as

$$\lim_{\sigma \rightarrow \infty} \mathcal{R}_0 = \frac{\rho h}{\mu + \delta} \quad [29]$$

68 This limit is confirmed numerically in figure 2

69 **E. Simulations.** All simulations are normalized to  $R_0$  in equation Eq. (20) to keep the results as general as possible. For human  
70 monkeypox, early estimates of  $R_0$  range between 1.1 and 1.26 (26), and it was hypothesized that human-human transmission  
71 before the current outbreaks had a reproduction number less than 1 (27). Therefore, we focus our study on values of  $R_0$  close  
72 to 1, and approaching 2 as the upper bound of estimates seems to be around 2(28). There are some parameters that were  
73 sourced from the literature on monkeypox. Other parameter values are provided for posterity, although they have no inherent  
74 value and are chosen for simplicity and to acquire an  $R_0$  in the correct range. All parameter values are given in Table ??.

The parameter values provided in Table 1, particularly  $\rho$  and  $\sigma$ , define a scenario where most partnerships are casual and  
short. When most partnerships are predominantly long,  $R_0 < 1$  and the population sees little risk of an epidemic.

With a formulation of  $R_0$ , we can look at infection curves for various values of  $R_0$ . We normalize our initial susceptible  
75 population to  $S_0 = 1$  and look at the infectious proportion of the population,  $(I + P_{SI} + 2P_{II} + P_{IR}) / (S + I + R)$ .

76 Figure 3 shows that if  $R_0$  is sufficiently large, we can expect a large initial outbreak that will burn itself out relatively  
77 quickly, while smaller values of  $R_0$  will lead to a longer but less severe outbreaks, in terms of peak magnitude and width of the  
78 infection curve.

79 Interestingly, as shown in Figure 4, waves of infection can be result from Model given by equations Eq. (1) - Eq. (9). The  
80 waves are driven by the introduction of new individuals to the population, through parameter  $B$ , and through the ability to  
81 dissolve old and develop new pairs. Multiple waves of infection that are separated by a period of relative inactivity result.  
82

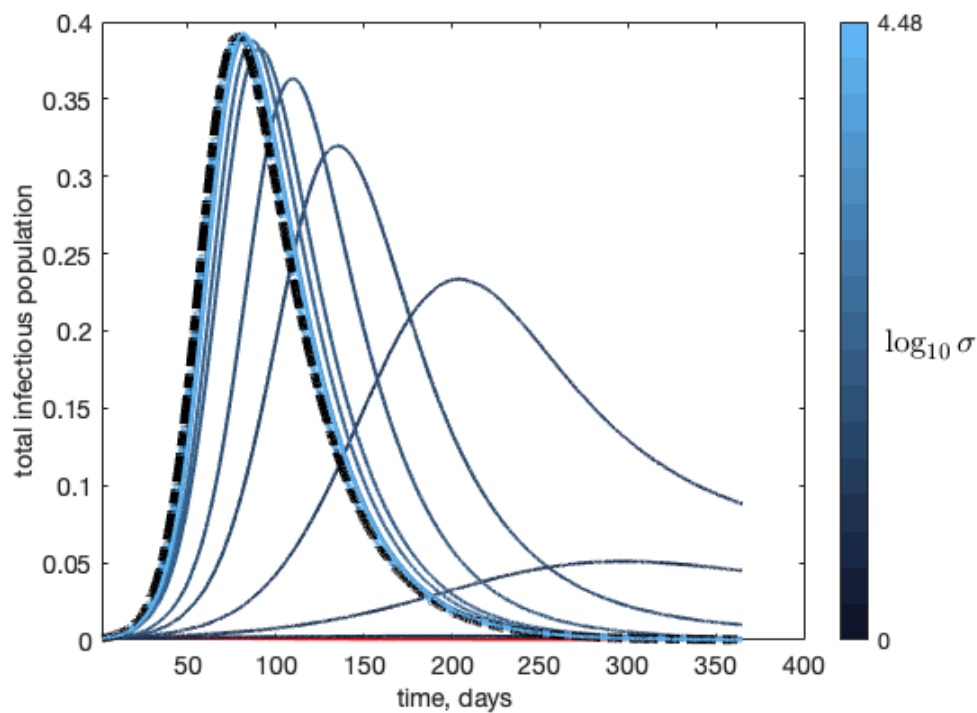

**Fig. 2.** As  $\sigma \rightarrow \infty$ , the pair model approaches the standard SIR model with mass action. The black broken line shows the total number of infections for the SIR model and the solid lines show the total infections over time as  $\sigma$  gets large.

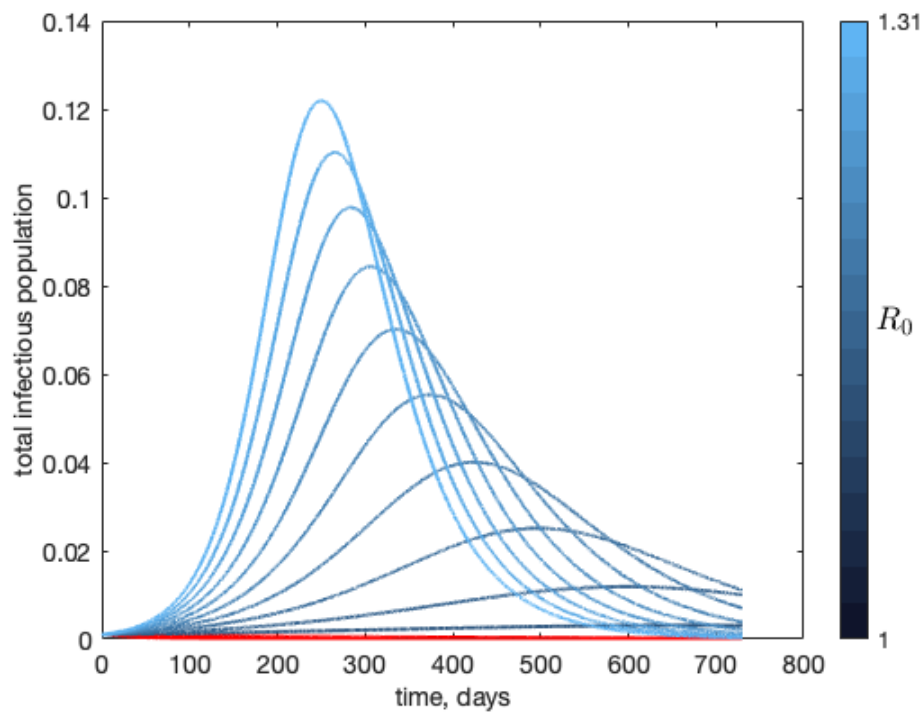

**Fig. 3.** The different outcomes of an outbreak as a function of  $R_0$ . The total infectious population,  $I + P_{SI} + 2P_{II} + P_{IR}$ , is shown for a range of  $R_0$ , from 1 to 1.31.

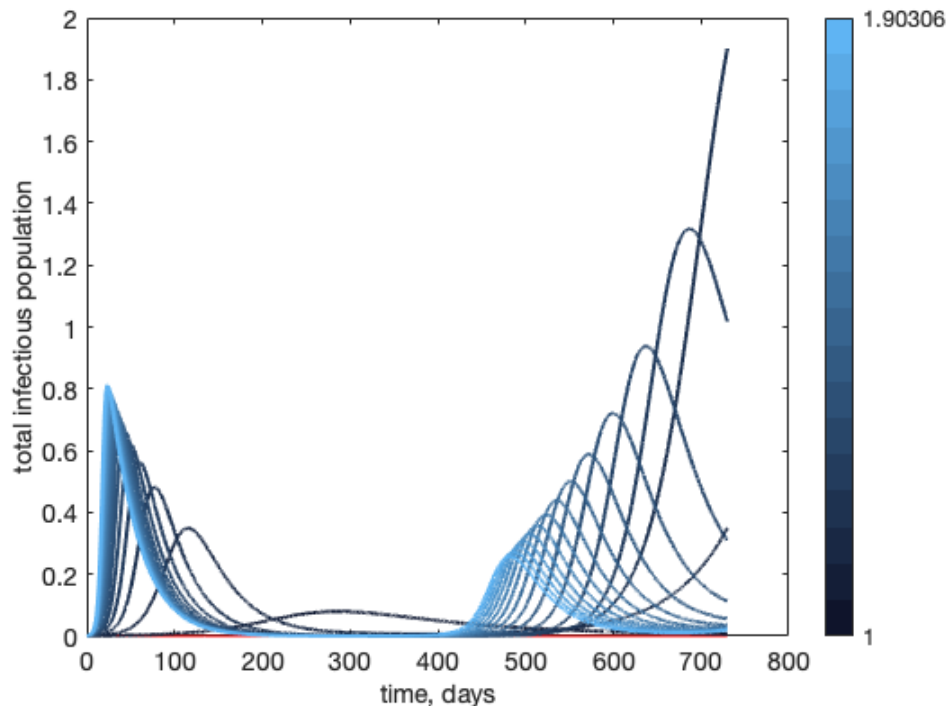

**Fig. 4.** Multiple waves of infection. The total infectious population,  $I + P_{SI} + 2P_{II} + P_{IR}$ , is shown for a range of  $R_0$ . Pair formation coupled with the ability to recover from infection leads to multi-wave dynamics.

85 Figure 4 also shows that a less severe first outbreak can lead to a much more severe second outbreak if no public health  
86 interventions occur. This can occur because the classes  $P_{II}$  and  $P_{IR}$  can act as a reservoir of infection.

87 Figure 5 compares the pair formation model to the standard *SIR* model with normalized incidence (equations Eq. (11)  
88 through Eq. (13)) for  $R_0 = 1.9$ . Here, we see that the multiple waves of infection are only possible due to the pair formation  
89 dynamics, and that the standard *SIR* model significantly underestimates the prevalence in the population while overestimating  
90 the amount of time an outbreak lasts.

## 91 5. Model Validation with Canadian and Global Monkeypox Data

92 So far, we have shown that a disease that requires finitely long close contact - as opposed to the instantaneous contact assumed  
93 by a standard *SIR* model - can create qualitatively different results with multiple waves of infection. We now turn to using the  
94 model to estimate parameters for a population dealing with human Monkeypox.

95 We fit equations Eq. (1) to Eq. (9) to human Monkeypox data for Canada as reported by the government of Canada (29);  
96 the same source provides us with global numbers. We use a standard least squares non-linear regression on the cumulative case  
97 counts and the new cases per day. We also fit the data to a standard *SIR* model.

98 For our fitting we fix  $\mu = B = 0$  as our time period is much shorter than the demographic time scales, we also fix  $\delta = 1/30$  as  
99 this parameter is fairly well-established in the literature. In order to account for the fluctuations in reporting rate and the true  
100 start time of the epidemic, we allow the initial conditions  $S(0)$ ,  $I(0)$ , and -where applicable -  $P_{SS}(0)$  to be fit as well.

101 The parameter estimates along with the Akaike and Bayesian Information Criteria are given in table 2 and the pair formation  
102 model fit shown in Figures 6 and 7.

## 103 6. Discussion

104 The model describes the novel scenario under which an infection is predominantly spread through close, prolonged contact but  
105 allows for recovery with immunity. This scenario has been overlooked in the literature as most STIs do not bestow immunity  
106 to the infected. Evidence to date shows that monkeypox is novel in that it fits this scenario.

107 Our formulation of  $R_0$  in equation Eq. (20) can be used as more data becomes available to develop estimates of either  $R_0$  or  
108 possible contact rates,  $\rho$  and  $\sigma$ , between individuals in any population.

109 It is interesting to note that our expression for  $R_0$  and the alternative expression for  $\mathcal{R}_0$  cannot be readily factored. This is  
110 due to the complexity of relationships between classes. As there are certain relationships that can be formed in this model where  
111 transmission is impossible, namely  $P_{IR}$ , the probability of transmission per partnership is intimately tied to pair formation.  
112 These dynamics prevent the two processes from being decoupled except for in limiting cases, like  $h = 1$  or  $\delta = 0$ .



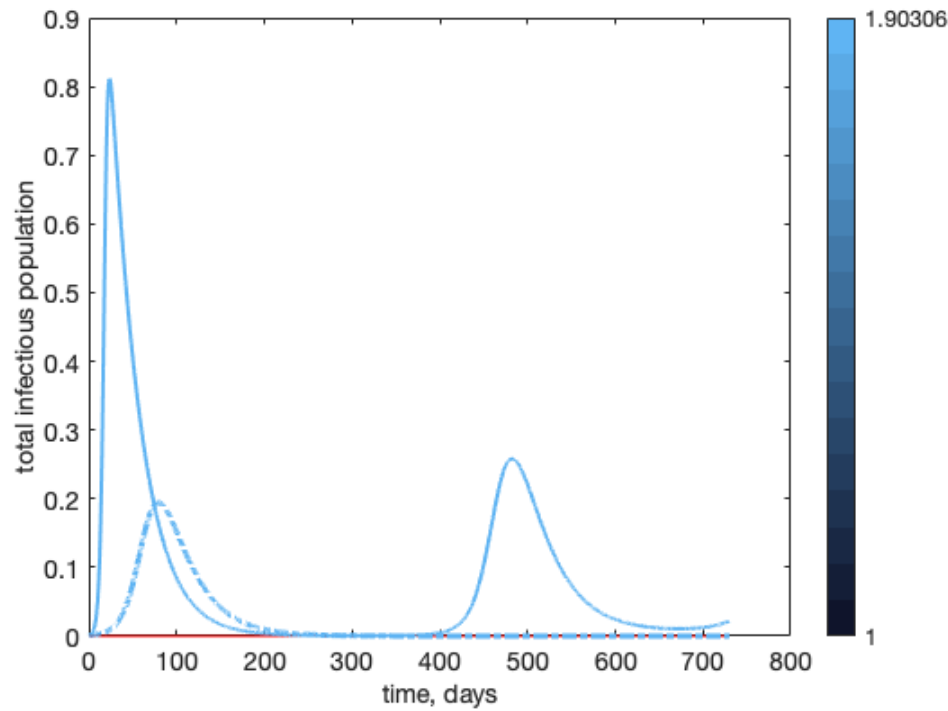

**Fig. 5.** A comparison of the pair formation model (equations Eq. (1) to Eq. (9)) with an *SIR* model with standard incidence (equations Eq. (11) to Eq. (13)). Parameters for both models are chosen so that  $R_0 = 1.9$  for both models.

| Parameter   | Canada                |                                       | World                 |                                        | Fixed |
|-------------|-----------------------|---------------------------------------|-----------------------|----------------------------------------|-------|
|             | SIR model             | Pair Formation Model                  | SIR model             | Pair Formation Model                   |       |
| $\delta$    | $1/30$                | $1/30$                                | $1/30$                | $1/30$                                 | ×     |
| $\mu$       | 0                     | 0                                     | 0                     | 0                                      | ×     |
| $S(0)$      | 853.83                | 902.56                                | 90681                 | 29709                                  |       |
| $I(0)$      | 1                     | 16.97                                 | 1                     | 0.284                                  |       |
| $P_{SS}(0)$ | N/A                   | 145.96                                | N/A                   | 14350                                  |       |
| $\rho$      | N/A                   | 0.30                                  | N/A                   | 0.58                                   |       |
| $\phi$      | N/A                   | 0.91                                  | N/A                   | $7.2 \times 10^{-5}$                   |       |
| $h$         | N/A                   | 0.395                                 | N/A                   | 0.89                                   |       |
| $\sigma$    | N/A                   | 11.17                                 | N/A                   | 0.1722                                 |       |
| $\beta$     | $1.68 \times 10^{-4}$ | N/A                                   | $9.78 \times 10^{-7}$ | N/A                                    |       |
| $R_0$       | 4.3*                  | $\mathcal{R}_0 = 2.7^*, R_0 = 1.45^*$ | 2.66*                 | $\mathcal{R}_0 = 2.31^*, R_0 = 1.45^*$ |       |
| AIC         | 1226                  | 991                                   | 2354                  | 2324                                   |       |
| BIC         | 1235                  | 1013                                  | 2364                  | 2347                                   |       |

**Table 2.** Table of fitted parameters for Canadian and global data, model selection parameters and basic reproduction number. \*Basic reproduction numbers are computed using equations Eq. (29), Eq. (20), and Eq. (21). Data is from the Canadian government (29).



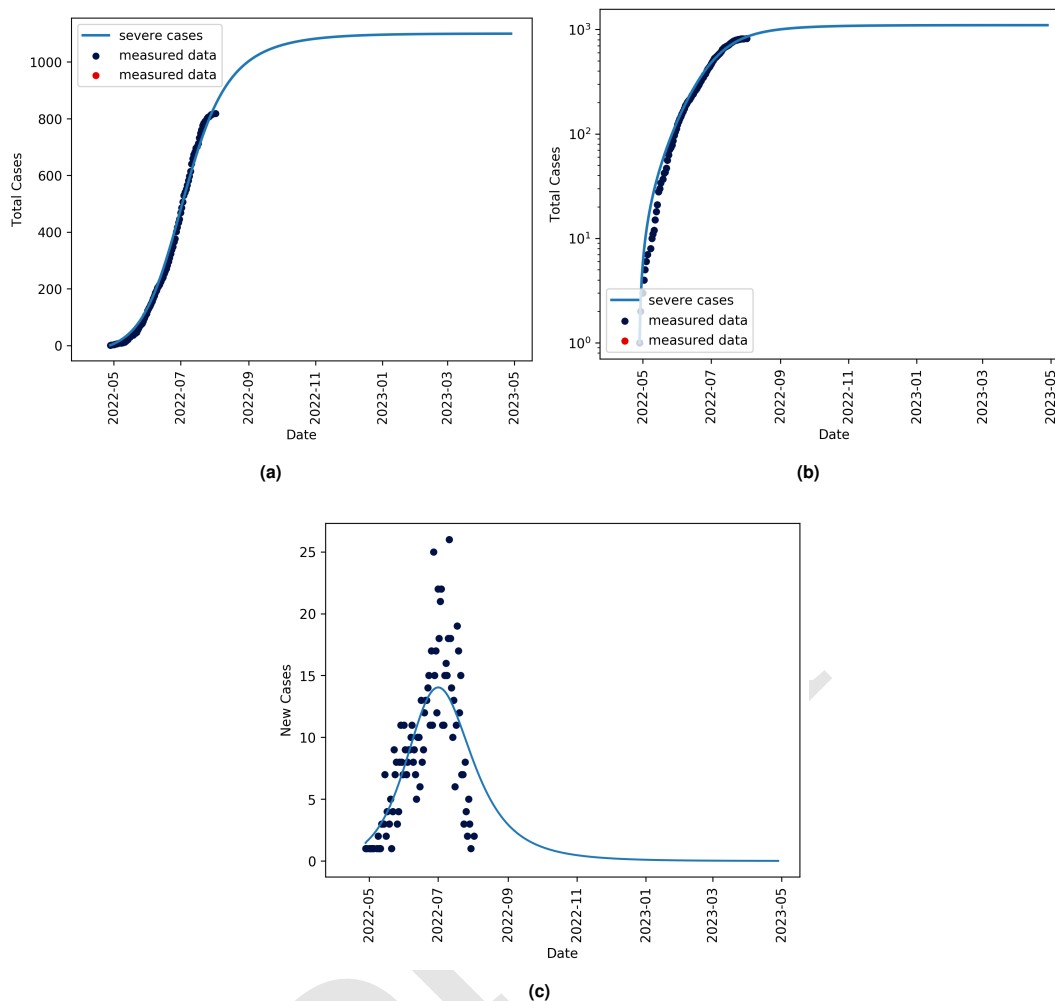

**Fig. 6.** Curves for cumulative infections in Canada on a linear scale (a) and log scale (b) for clarity. Panel (c) shows the new cases per day. Canadian data is taken from (29) and fits are generated using equations Eq. (1) to Eq. (9).

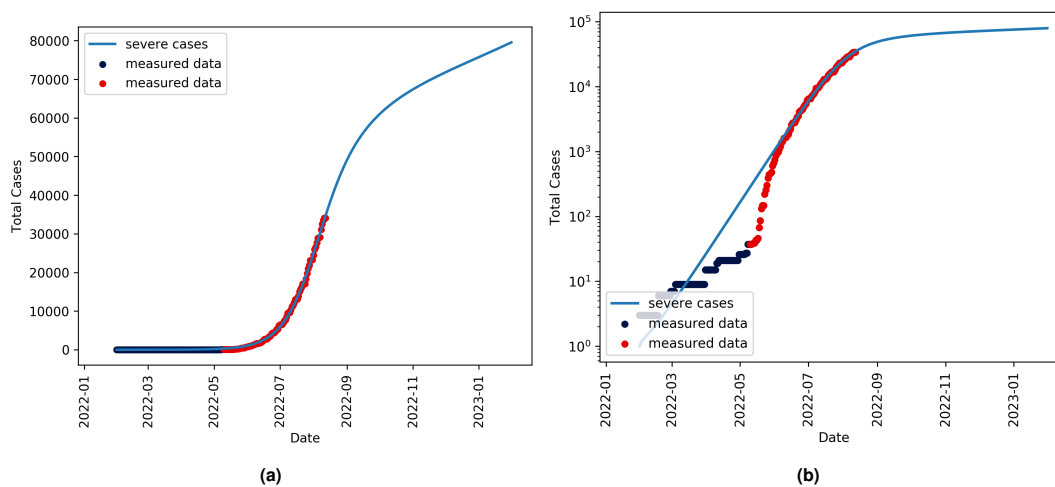

**Fig. 7.** Curves for cumulative infections globally on a linear scale (a) and log scale (b) for clarity. World data is taken from (29) and fits are generated using equations Eq. (1) to Eq. (9).

113 Having two expressions for the basic reproduction number leads to questions of which has more real-world applicability. We  
114 present both formulations for posterity. Questions of which to use and when are difficult to answer without more data on  
115 monkeypox, or experimental estimates of the parameters that make up the basic reproduction number. It is likely that each  
116 finds validity in a different parameter regime, and this will be the subject of further study. For instance, the expression for  $\mathcal{R}_0$   
117 has the benefit of reducing exactly to the basic reproduction number for the pair formation model without recovery. On the  
118 other hand,  $R_0$  leads to a factored and more readily interpretable expression for  $n_{R_0}$ .

119 Our results show that the pair formation *SIR* model differs in dynamics from a typical *SIR* model in that individuals in  
120 partnerships with immune individuals can create a reservoir which can lead to a future secondary outbreak. The severity  
121 of the secondary outbreak is inversely proportional to the severity of the initial outbreak. Of course, if pair formations are  
122 increasingly frequent,  $\rho \rightarrow \infty$  and  $\sigma \rightarrow \infty$  the dynamics of this model approach those of a standard *SIR* model.

123 In terms of public health measures, this means that resources should be put toward monitoring and suppressing spread  
124 even after the initial wave of cases seems to have subsided as a lack of public health measures during this time can lead to a  
125 secondary epidemic.

126 More generally, the limit results show that this model is essentially a refinement on the standard *SIR* model. This model  
127 may be more useful for any infectious disease that requires prolonged exposure, or where forecasting accurate quantitative  
128 infection curves is of greater importance. The values of  $\sigma$  and  $\rho$  are also more readily interpretable and measurable than the  
129 often vague and nebulous contact rate given in a standard mass action model. This can lead to more accurate estimates of  $R_0$ .

130 While currently data on this new monkeypox epidemic is relatively sparse, the model can nonetheless be developed and  
131 extended to allow for a wide range of scenarios. While the number of compartments grows quite quickly with each new  
132 complexity, the number of parameters does not grow as fast allowing for robust usage even with only moderate quality data.

133 We use available data for Canada to fit the model. Interestingly, despite having more than twice as many parameters,  
134 the model selection criteria used - the AIC and BIC - both confirm that the increase in likelihood outweighs the additional  
135 complexity when compared to a standard *SIR* model.

136 The parameters estimated can help inform target criteria for vaccination of a high-risk group. For instance, our model  
137 predicts  $\rho$  to have a value of 0.30 which translates to roughly as two close contacts per week and  $\sigma$  suggests that close contact  
138 be defined as approximately 2 hours of contact. Of course, with better data that is more targeted, the estimates would be  
139 far better. Also of note is that the reproduction number between the *SIR* and pair-formation model is in closer agreement  
140 when fitting global data. This allows us to state that the estimated basic reproduction number of human monkeypox to be  
141  $\approx 2.31 - 2.66$ .

142 One of the hardest parameters to estimate - and why confidence intervals for validation cannot be easily stated - is the  
143 effective susceptible population,  $S(0)$ . Since this model is assuming a homogeneous, pair-forming population (i.e. men who  
144 have sex with men) who are particularly high-risk it is unclear what the total susceptible population. By allowing this value to  
145 be fit, we get an idea of the possible final size of an outbreak at the expense of ill-defined confidence intervals. Extending this  
146 model to include other key demographic populations would allow this initial condition to be set and allow for a far more robust  
147 fitting of data. Of course, this comes at the expense of a more complex model.

148 Figure 7 highlights the qualitative dynamics of the pair formation model that are impossible in the standard *SIR* model. We  
149 see that after a period of sharp growth, we see sustained slow growth of cases over time. This is in contrast to a standard *SIR*  
150 model which will plateau.

151 The model can be extended to incorporate a high-risk and low-risk population to determine potential for spillover from a  
152 high-risk population into a larger low-risk population.

153 In the case of monkeypox, it is known that the virus can and does survive in a variety of animal hosts (30). While these  
154 animal reservoirs are currently localized to West and Central Africa (12), the global spread of monkeypox creates the risk that  
155 animal reservoirs, particularly in rodents and pets (31), can be created in other parts of the world. The model presented here  
156 can be augmented to include an animal reservoir to assess risk of such a scenario occurring and explore preventative measures.

157 **ACKNOWLEDGMENTS.** Please include your acknowledgments here, set in a single paragraph. Please do not include any acknowledgments  
158 in the Supporting Information, or anywhere else in the manuscript.

- 159 1. NM Ferguson, GP Garnett, More realistic models of sexually transmitted disease transmission dynamics: sexual partnership networks, pair models, and moment closure. *Sex. transmitted diseases* pp. 600–609 (2000).
- 160 2. RC Brunham, B Pourbahloul, S Mak, R White, ML Rekart, The unexpected impact of a chlamydia trachomatis infection control program on susceptibility to reinfection. *The J. infectious diseases* **192**, 1836–1844 (2005).
- 161 3. KE Miller, Diagnosis and treatment of chlamydia trachomatis infection. *Am. family physician* **73**, 1411–1416 (2006).
- 162 4. P De, AE Singh, T Wong, A Kaida, Predictors of gonorrhoea reinfection in a cohort of sexually transmitted disease patients in alberta, canada, 1991-2003. *Sex. transmitted diseases* pp. 30–36 (2007).
- 163 5. HH Handsfield, et al., A comparison of single-dose cefixime with ceftriaxone as treatment for uncomplicated gonorrhoea. *New Engl. J. Medicine* **325**, 1337–1341 (1991).
- 164 6. SG Deeks, SR Lewin, DV Havlir, The end of aids: Hiv infection as a chronic disease. *The lancet* **382**, 1525–1533 (2013).
- 165 7. RD Everett, Hsv-1 biology and life cycle in *Herpes Simplex Virus*. (Springer), pp. 1–17 (2014).
- 166 8. M Kretzschmar, K Dietz, The effect of pair formation and variable infectivity on the spread of an infection without recovery. *Math. biosciences* **148**, 83–113 (1998).
- 167 9. M Kretzschmar, JC Jager, DP Reinking, G Van Zessen, H Brouwers, The basic reproduction ratio  $r_0$  for a sexually transmitted disease in pair formation model with two types of pairs. *Math. biosciences* **124**, 181–205 (1994).
- 168 10. M Kretzschmar, JC Heijne, Pair formation models for sexually transmitted infections: a primer. *Infect. Dis. Model.* **2**, 368–378 (2017).
- 169 11. A Zumla, et al., Monkeypox outbreaks outside endemic regions: scientific and social priorities. *The Lancet Infect. Dis.* (2022).
- 170 12. KN Durski, et al., Emergence of monkeypox west and central africa, 1970–2017. *Morb. mortality weekly report* **67**, 306 (2018).
- 171 13. I Ladnyj, P Ziegler, E Kima, A human infection caused by monkeypox virus in basankusu territory, democratic republic of the congo. *Bull. World Heal. Organ.* **46**, 593 (1972).
- 172 14. KL Karem, et al., Monkeypox-induced immunity and failure of childhood smallpox vaccination to provide complete protection. *Clin. Vaccine Immunol.* **14**, 1318–1327 (2007).
- 173 15. MG Reynolds, IK Damon, Outbreaks of human monkeypox after cessation of smallpox vaccination. *Trends microbiology* **20**, 80–87 (2012).
- 174 16. R Heberling, S Kalter, Induction, course, and transmissibility of monkeypox in the baboon (*papio cynocephalus*). *J. Infect. Dis.* **124**, 33–38 (1971).

- 178 17. N Sklenovska, M Van Ranst, Emergence of monkeypox as the most important orthopoxvirus infection in humans. *Front. public health* **6**, 241 (2018).  
179 18. RR ASSESSMENT, Monkeypox multi-country outbreak (2022).  
180 19. A Karan, et al., Human monkeypox without viral prodrome or sexual exposure, california, usa, 2022. *Emerg. Infect. Dis.* **28** (year?).  
181 20. AM McCollum, IK Damon, Human monkeypox. *Clin. infectious diseases* **58**, 260–267 (2014).  
182 21. Y Edghill-Smith, et al., Smallpox vaccine-induced antibodies are necessary and sufficient for protection against monkeypox virus. *Nat. medicine* **11**, 740–747 (2005).  
183 22. N Haider, et al., Increased outbreaks of monkeypox highlight gaps in actual disease burden in sub-saharan africa and in animal reservoirs. *Int. J. Infect. Dis.* (2022).  
184 23. R Freak-Poli, It's not age that prevents sexual activity later in life. *Australas. J. on Ageing* **39**, 22–29 (2020).  
185 24. GD Huhn, et al., Clinical characteristics of human monkeypox, and risk factors for severe disease. *Clin. infectious diseases* **41**, 1742–1751 (2005).  
186 25. P Van den Driessche, J Watmough, Reproduction numbers and sub-threshold endemic equilibria for compartmental models of disease transmission. *Math. biosciences* **180**, 29–48 (2002).  
187 26. M Hamins-Puertolas, M Charpignon, MS Majumder, An early transmissibility estimate for the 2022 monkeypox outbreak. Available at SSRN (2022).  
188 27. Z Yang, Monkeypox: a potential global threat? *J. Med. Virol.* (2022).  
189 28. R Grant, LBL Nguyen, R Breban, Modelling human-to-human transmission of monkeypox. *Bull. World Heal. Organ.* **98**, 638 (2020).  
190 29. G of Canada, Monkeypox epidemiology update (<https://health-infobase.canada.ca/monkeypox/>) (year?).  
191 30. S Parker, A Nuara, RML Buller, DA Schultz, Human monkeypox: an emerging zoonotic disease. *Futur. Microbiol.* (2007).  
192 31. S Seang, et al., Evidence of human-to-dog transmission of monkeypox virus. *The Lancet* (2022).

DRAFT
